# Supplementary material for: Interplay of the mechanical and structural properties of DNA nanostructures determines their electrostatic interactions with lipid membranes
Source: Royal Society of Chemistry journal article supplement (doi:10.1039/d2nr05368c), 2023-01-01
Supplement: d2nr05368c1.pdf [file d2nr05368c1.pdf]

Supplementary Information for

Interplay of Mechanical and Structural Properties of DNA Nanostructures Determines  
Their Electrostatic Interactions with Lipid Membranes

Diana Morzy<sup>a</sup>, Cem Tekin<sup>a</sup>, Vincenzo Caroprese<sup>a</sup>, Roger Rubio-Sánchez<sup>b,c,d</sup>, Lorenzo Di Michele<sup>b,c</sup>  
and Maartje M.C. Bastings<sup>a,e\*</sup>

- 
- a Programmable Biomaterials Laboratory, Institute of Materials, School of Engineering, Ecole Polytechnique Fédérale Lausanne, Lausanne, 1015, Switzerland;  
E-mail: [maartje.bastings@epfl.ch](mailto:maartje.bastings@epfl.ch)
- b Department of Chemistry, Molecular Sciences Research Hub, Imperial College London, London W12 0BZ, United Kingdom
- c fabriCELL, Molecular Sciences Research Hub, Imperial College London, London W12 0BZ, United Kingdom;
- d Cavendish Laboratory, University of Cambridge, JJ Thomson Avenue, Cambridge CB3 0HE, United Kingdom;
- e Interfaculty Bioengineering Institute, School of Engineering, Ecole Polytechnique Fédérale Lausanne, Lausanne, 1015, Switzerland

All data is available free of charge under DOI 10.5281/zenodo.6984753

(<https://zenodo.org/record/6984753#.YvZd4xzP2Uk>)

List of Figures

|                  |    |
|------------------|----|
| Figure S1 .....  | 2  |
| Figure S2 .....  | 3  |
| Figure S3 .....  | 4  |
| Figure S4 .....  | 5  |
| Figure S5 .....  | 6  |
| Figure S6 .....  | 7  |
| Figure S7 .....  | 8  |
| Figure S8 .....  | 9  |
| Figure S9 .....  | 10 |
| Figure S10 ..... | 11 |
| Figure S11 ..... | 12 |

List of Tables

|                |    |
|----------------|----|
| Table S1 ..... | 14 |
| Table S2 ..... | 15 |
| Table S3 ..... | 15 |
| Table S4 ..... | 15 |

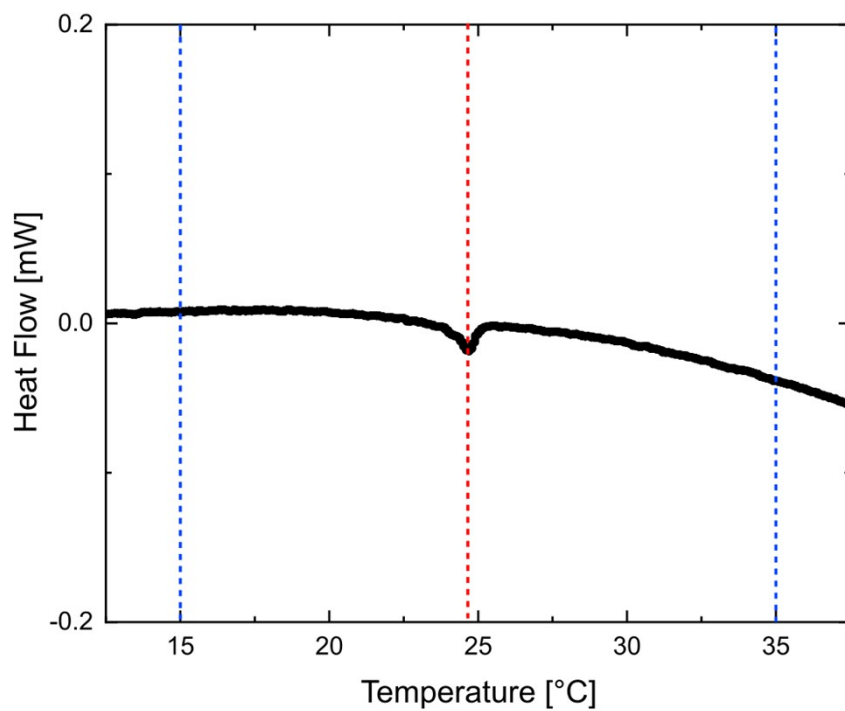

Figure S1 Differential scanning calorimetry DSC measurements of extruded DMPC vesicles (2.5 mg/ml), measured in the range of 10-40 °C, with a rate of 1 °C/min. The dashed lines represent the phase transition temperature (red) and the temperatures at which zeta potential measurements were performed, to ensure working in either liquid (35 °C) or gel (15 °C) phase. (blue).

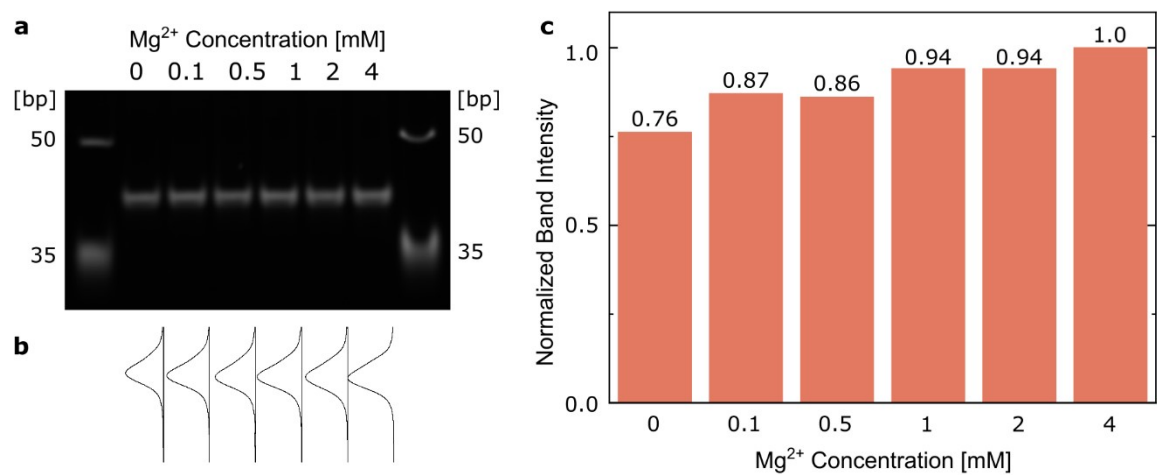

Figure S2 Polyacrylamide gel electrophoresis analysis of 40 bp-long duplex in various  $Mg^{2+}$  concentrations. (a) The gel image, also presented in Fig. 2e, alongside (b) the collected intensity profiles from the wells and (c) analyzed values plotted. The obtained, normalized intensities are added above each column.

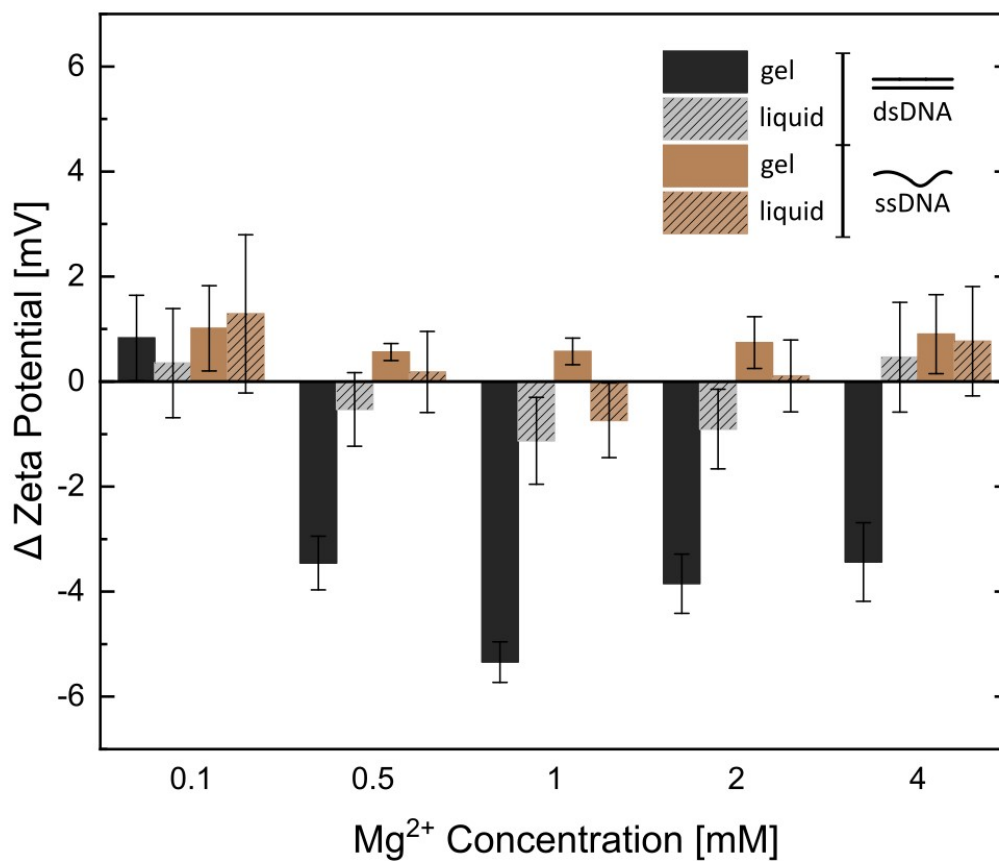

Figure S3 Differences in zeta potential of vesicles with and without DNA ( $\Delta\zeta = \zeta_{(\text{vesicles}+\text{DNA})} - \zeta_{\text{vesicles}}$ ). Values obtained when incubating ssDNA (40 nt) or dsDNA (40 bp) with DMPC in liquid or gel phase. While dsDNA with liquid-phased vesicles and ssDNA show marginal change after DNA was added to the vesicles, dsDNA shows a large drop of zeta potential above 0.5 mM  $\text{MgCl}_2$ , indicating DNA attachment to gel-phased lipid surface.

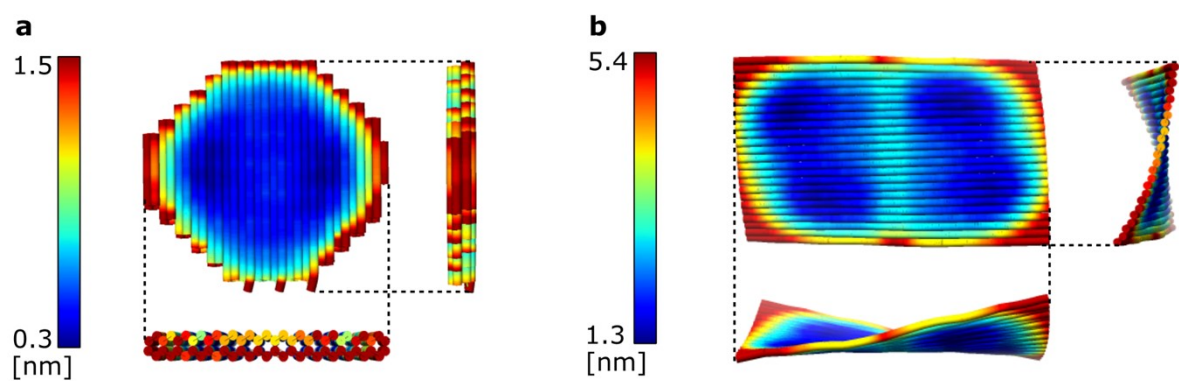

Figure S4 CanDo analysis of the two studied DNA origami structures: (a) *disk* and (b) *plate*. The colour scale represents the RMSF. Note the large difference between fluctuation scales of the two designs.

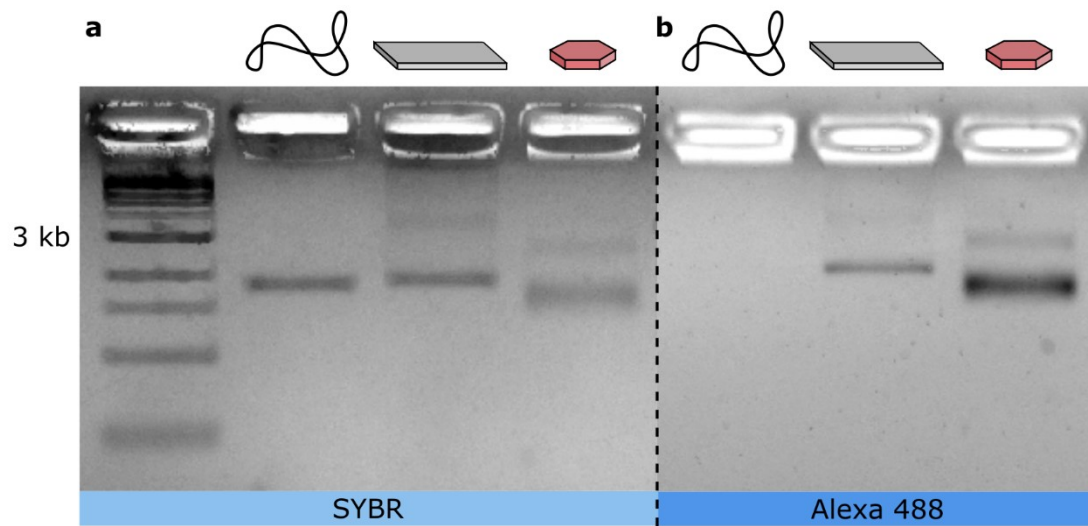

Figure S5 Agarose gel electrophoresis confirmed the folding of *disk* and *plate* origami structures (Fig 4), compared with p7560 scaffold. Panel (a) represents the SYBR signal, while (b) shows the Alexa488 modification. The same gel was imaged sequentially, starting with Alexa488 signal, and only then incubated with SYBR Safe solution, due to overlapping fluorescence spectra. Relative intensities of Alexa488 signal were measured (*plate* – 1x, *disk* – 3.8x), and used to adjust and interpret results shown in Fig. 4.

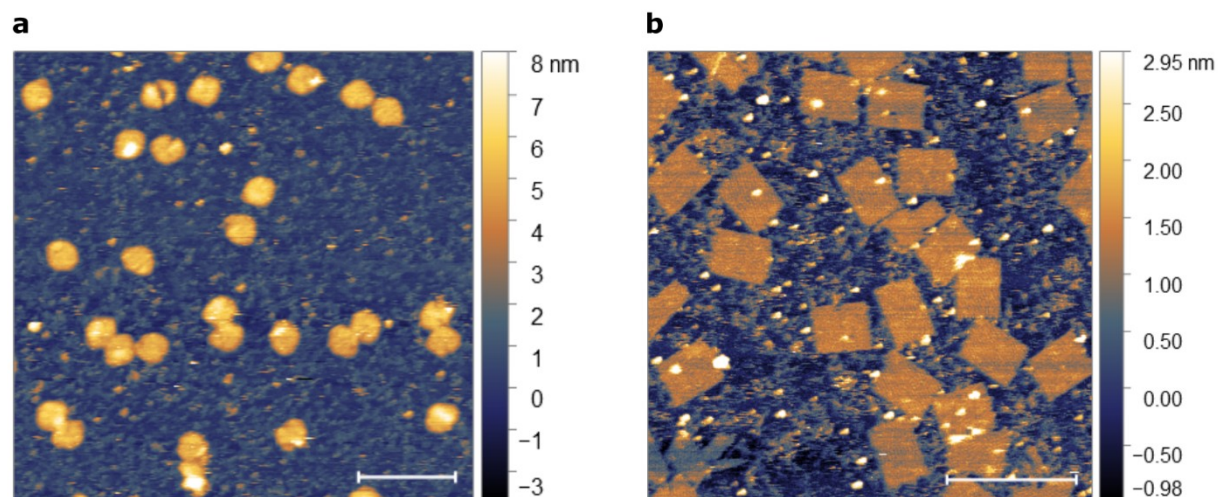

Figure S6 Atomic force microscopy images of (a) *disk* and (b) *plate* DNA origami structures. Scale bars: 200 nm.

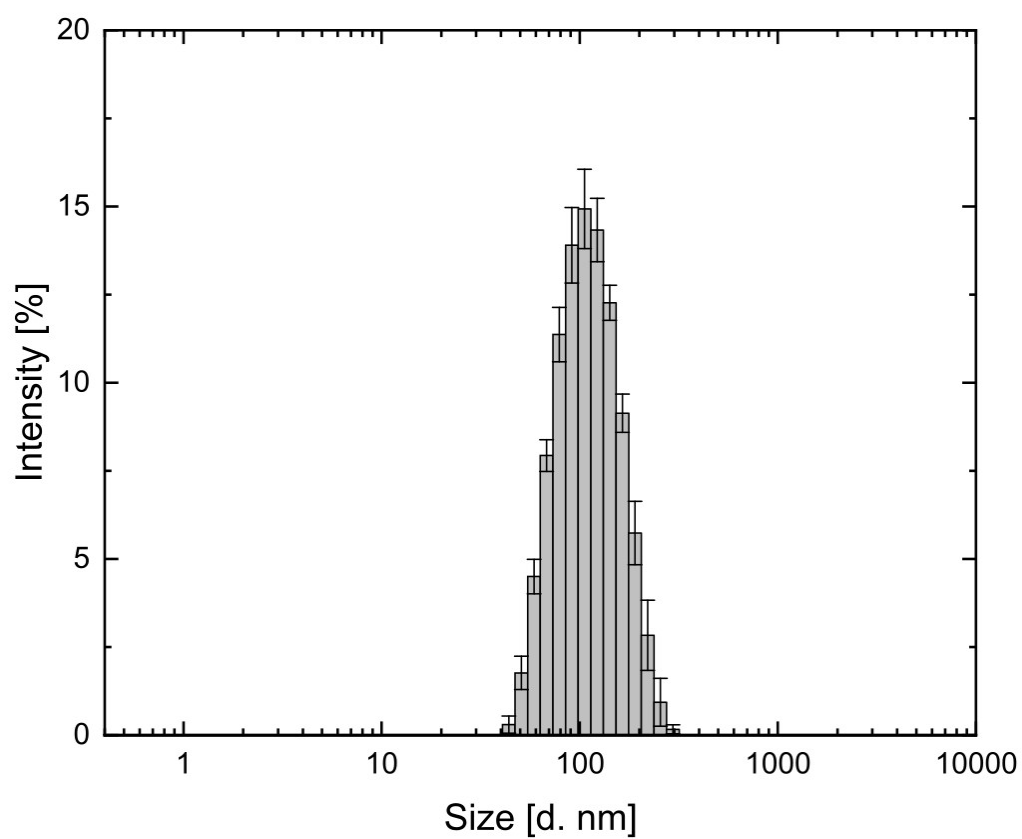

Figure S7 Dynamic light scattering (DLS) measurements of DMPC vesicles extruded through 100 nm filter. Error bars represent standard deviation from three measurements, each consisting of 12 runs.



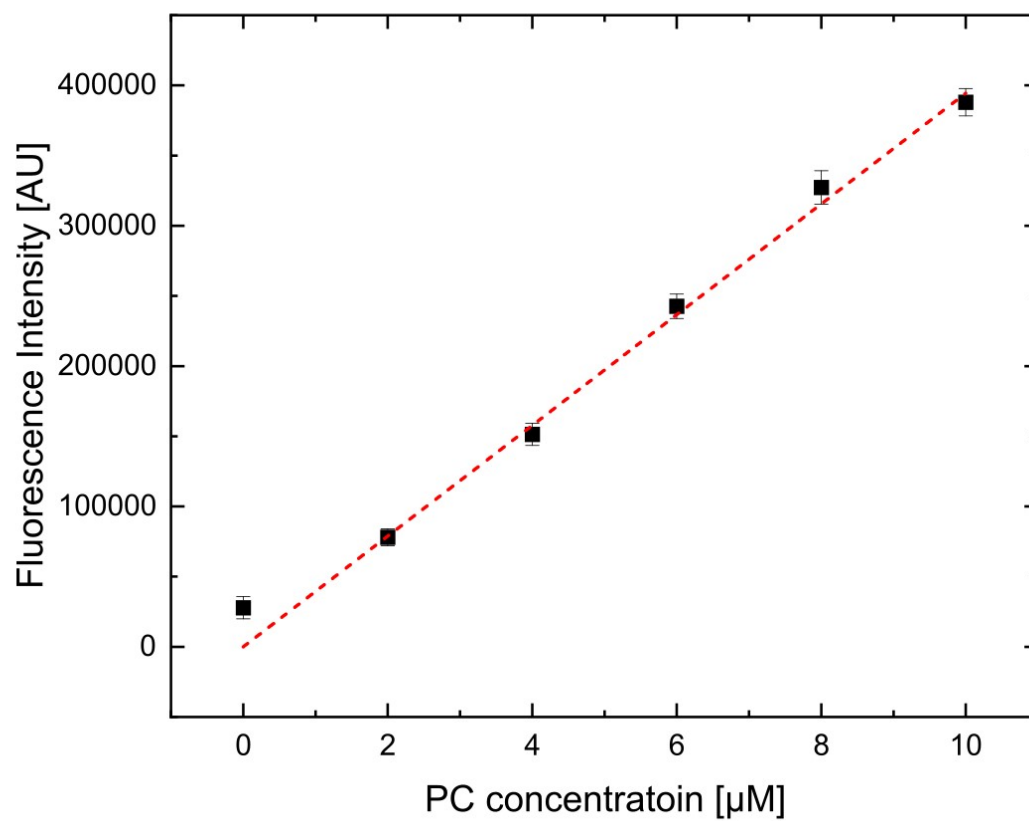

Figure S8 Calibration curve for PC concentration assay, used to compare the available lipid surface between DOPC and DPPC vesicles (Fig. 1b, Fig 4e-f). Error bars represent standard deviation from four measurements done on two separate days.

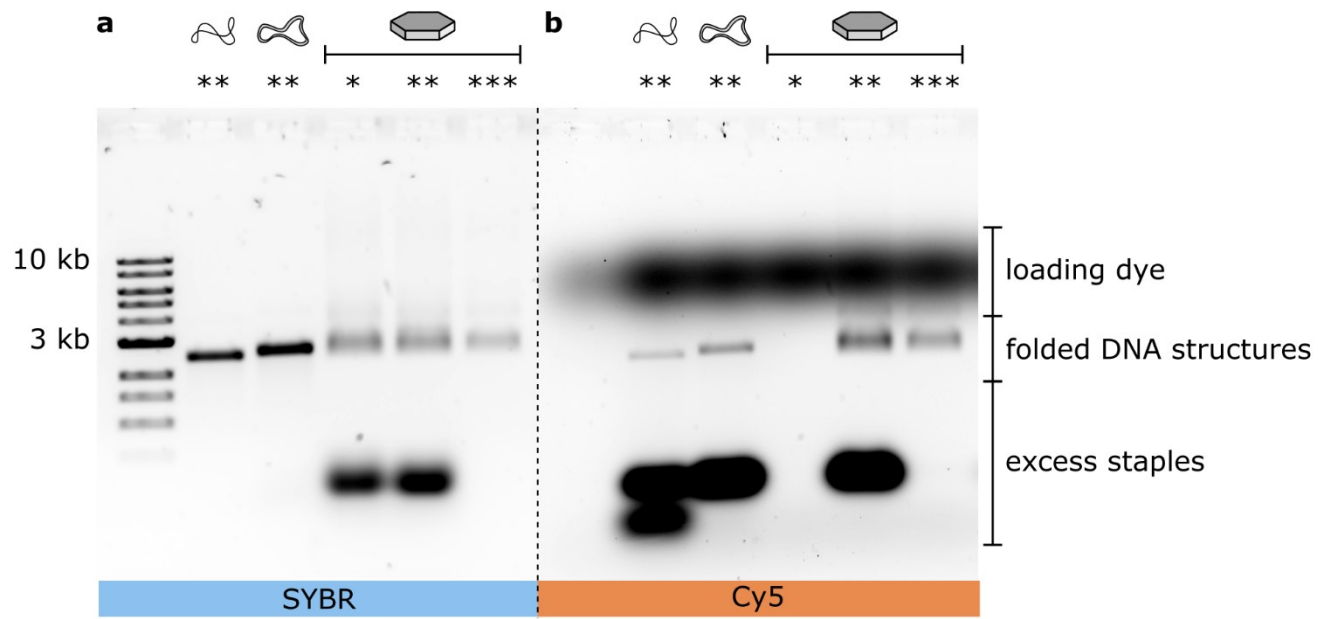

Figure S9 Agarose gel electrophoresis of Cy5-labelled long ssDNA, long dsDNA and origami *disc*. Signal was obtained from simultaneous (a) SYBR and (b) Cy5 excitation. Legend for the asterisks markings is as follows: \* before labelling, \*\* after labelling, \*\*\* after purification

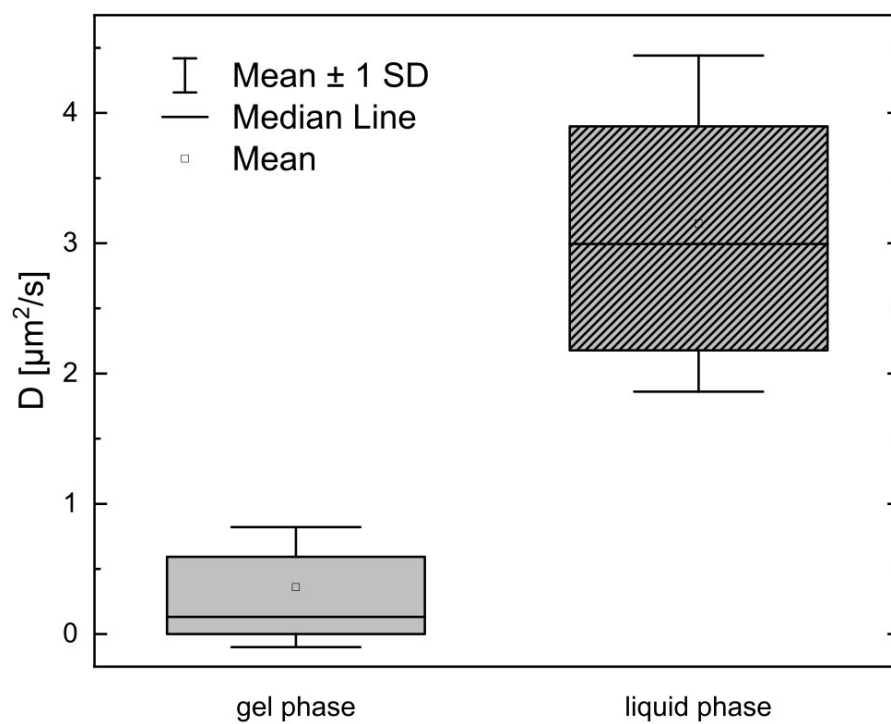

Figure S10 Box plots of diffusion coefficients ( $D$ ) obtained from FRAP experiments on vesicles in their gel (DPPC) and liquid (DOPC) phase. Collected number of vesicles:  $N_{\text{DPPC}} = 10$ ,  $N_{\text{DOPC}} = 28$ .

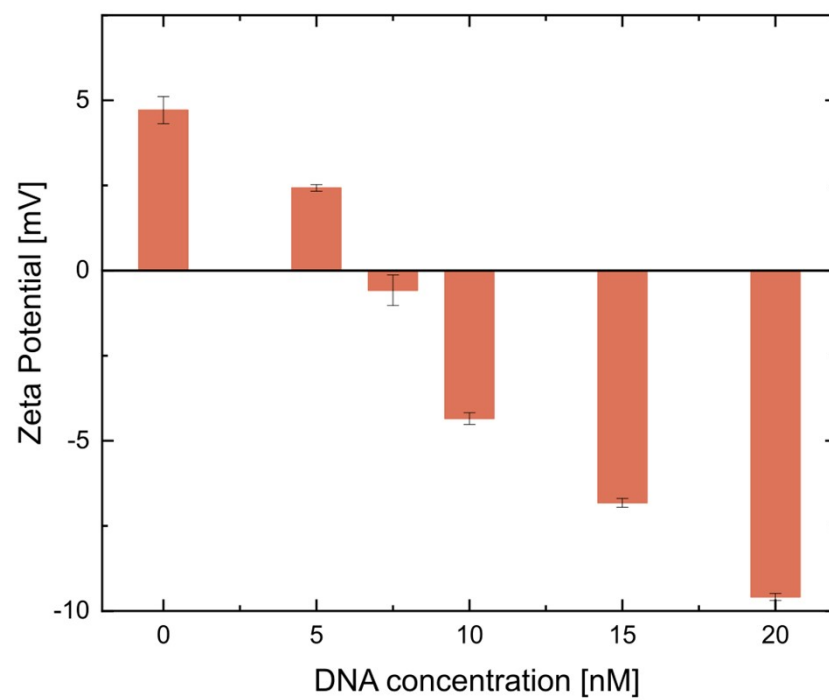

Figure S11 Zeta potential values obtained for various DNA:lipid ratios. The analyzed DNA structure was a 40 bp-long duplex in stated concentration, incubated with 12.5  $\mu\text{g/ml}$  of DMPC vesicles in gel phase.

Table S1

Sequences of oligonucleotides used to build a library of DNA duplexes presented in Fig. 3. Mod. stands for modification. Nucleotides highlighted in red are unpaired.

| Structure | Strand | Sequence                                                       | Length | Mod.  |
|-----------|--------|----------------------------------------------------------------|--------|-------|
| =         | S1     | ACTGATTACATCGACATGCA                                           | 20     | 5'Cy5 |
|           | S2     | TGTCATGTCGATGTAATCAGT                                          | 21     |       |
| ==        | S1     | ACTGATTACATCGACATGCATAGCTAACGGTCTCAATCTA                       | 40     | 5'Cy5 |
|           | S2     | TAGATTGAGACCGTTAGCTATGCATGTCGATGTAATCAGT                       | 41     |       |
| ===       | S1     | ACTGATTACATCGACATGCATAGCTAACGGTCTCAATCTACAACATGCAGATATCGTCTT   | 60     | 5'Cy5 |
|           | S2     | TAAGACGATATCTGTCATGTTGTAGATTGAGACCGTTAGCTATGCATGTCGATGTAATCAGT | 61     |       |
| ==        | S1     | ACTGATTACATCGACATGCATAGCTAACGGTCTCAATCTACAACATGCAGATATCGTCTT   | 60     | 5'Cy5 |
|           | S2A    | TAAGACGATATCTGTCATGTTG                                         | 21     |       |
|           | S2C    | TGCATGTCGATGTAATCAGT                                           | 20     |       |
| ==        | S1     | ACTGATTACATCGACATGCATAGCTAACGGTCTCAATCTACAACATGCAGATATCGTCTT   | 60     | 5'Cy5 |
|           | S2A    | TAAGACGATATCTGTCATGTTG                                         | 21     |       |
|           | S2B    | TAGATTGAGACCGTTAGCTA                                           | 20     |       |
| ===       | S1     | ACTGATTACATCGACATGCATAGCTAACGGTCTCAATCTACAACATGCAGATATCGTCTT   | 60     | 5'Cy5 |
|           | S2A    | TAAGACGATATCTGTCATGTTG                                         | 21     |       |
|           | S2B    | TAGATTGAGACCGTTAGCTA                                           | 20     |       |
|           | S2C    | TGCATGTCGATGTAATCAGT                                           | 20     |       |
| ===       | S2-1T  | AAGACGATATCTGTCATGTTGTAGATTGAGACCGTTAGCTATGTCATGTCGATGTAATCAGT | 62     | 5'Cy5 |
|           | S1     | ACTGATTACATCGACATGCA                                           | 20     |       |
|           | S1B    | TAGCTAACGGTCTCAATCTA                                           | 20     |       |
|           | S1C    | CAACATGCAGATATCGTCTT                                           | 20     |       |
| ===       | S2-2T  | AAGACGATATCTGTCATGTTGTAGATTGAGACCGTTAGCTATGTCATGTCGATGTAATCAGT | 64     | 5'Cy5 |
|           | S1     | ACTGATTACATCGACATGCA                                           | 20     |       |
|           | S1B    | TAGCTAACGGTCTCAATCTA                                           | 20     |       |
|           | S1C    | CAACATGCAGATATCGTCTT                                           | 20     |       |
| ===       | S2-3T  | AAGACGATATCTGTCATGTTGTAGATTGAGACCGTTAGCTATGTCATGTCGATGTAATCAGT | 66     | 5'Cy5 |
|           | S1     | ACTGATTACATCGACATGCA                                           | 20     |       |
|           | S1B    | TAGCTAACGGTCTCAATCTA                                           | 20     |       |
|           | S1C    | CAACATGCAGATATCGTCTT                                           | 20     |       |

Table S2 Number of vesicles used to create box plot in Fig. 2c

|                                      |     |     |     |     |     |     |
|--------------------------------------|-----|-----|-----|-----|-----|-----|
| MgCl <sub>2</sub> concentration [mM] | 0.1 | 0.2 | 0.6 | 1.1 | 2.1 | 4.1 |
| Number of vesicles                   | 122 | 160 | 114 | 87  | 135 | 113 |

Table S3 Number of vesicles used to create box plot in Fig. 3e

|                    |                                                                                   |                                                                                   |                                                                                   |                                                                                   |                                                                                   |                                                                                     |                                                                                     |                                                                                     |                                                                                     |
|--------------------|-----------------------------------------------------------------------------------|-----------------------------------------------------------------------------------|-----------------------------------------------------------------------------------|-----------------------------------------------------------------------------------|-----------------------------------------------------------------------------------|-------------------------------------------------------------------------------------|-------------------------------------------------------------------------------------|-------------------------------------------------------------------------------------|-------------------------------------------------------------------------------------|
| DNA structure      |  |  |  |  |  |  |  |  |  |
| Number of vesicles | 290                                                                               | 256                                                                               | 400                                                                               | 254                                                                               | 503                                                                               | 354                                                                                 | 341                                                                                 | 374                                                                                 | 422                                                                                 |

Table S4 Number of vesicles used to create box plot in Fig. 4e

|                           |                   |                      |                  |                     |
|---------------------------|-------------------|----------------------|------------------|---------------------|
| DNA structure/lipid phase | <i>plate</i> /gel | <i>plate</i> /liquid | <i>disc</i> /gel | <i>disc</i> /liquid |
| Number of vesicles        | 63                | 81                   | 75               | 191                 |
